# Supplementary material for: Trace Sn modified Zn catalysts for efficient CO2 electroreduction to HCOOH
Source: Royal Society of Chemistry journal article supplement (doi:10.1039/d4qi01120a), 2024-01-01
Supplement: d4qi01120a1.pdf [file d4qi01120a1.pdf]

## Supporting Information

# Trace Sn modified Zn catalysts for efficient CO<sub>2</sub> electroreduction to HCOOH

Rui Yang<sup>a\*</sup>, Hao Fu<sup>a</sup>, Zimin Han<sup>a</sup>, Guoqing Feng<sup>a</sup>, Huaizhi Liu<sup>a</sup>, Yangguang Hu<sup>b\*</sup>, Yiyin Huang<sup>c\*</sup>

<sup>a</sup>School of Materials and Chemistry, Anhui Agricultural University, Biomass Molecular Engineering Center, Engineering Research Center for High-Performance Fiber Products for Automobile of Anhui Province, Hefei, 230036, P.R. China

<sup>b</sup>Hefei National Laboratory for Physical Sciences at the Microscale, iChEM, School of Chemistry and Materials Science, and National Synchrotron Radiation Laboratory, University of Science and Technology of China, Hefei, Anhui 230026, China.

<sup>c</sup>College of Physics and Energy, Fujian Normal University, Fujian Provincial Key Laboratory of Quantum Manipulation and New Energy Materials, Fuzhou, 350117, China

Corresponding author: [ruiyang@ahau.edu.cn](mailto:ruiyang@ahau.edu.cn) (R. Yang)

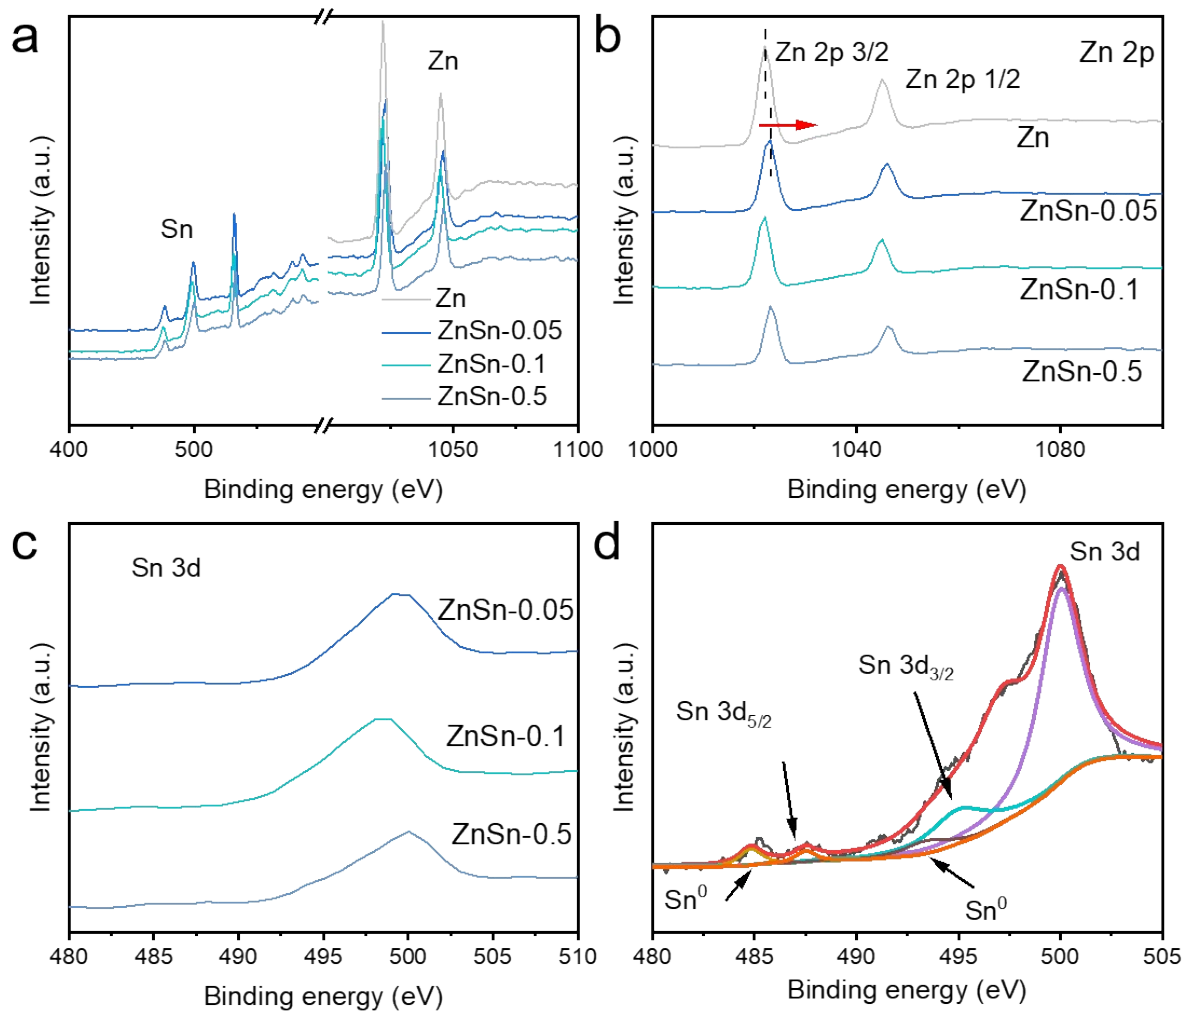

Figure S1. XPS for prepared materials and fine spectra of Zn and Sn.

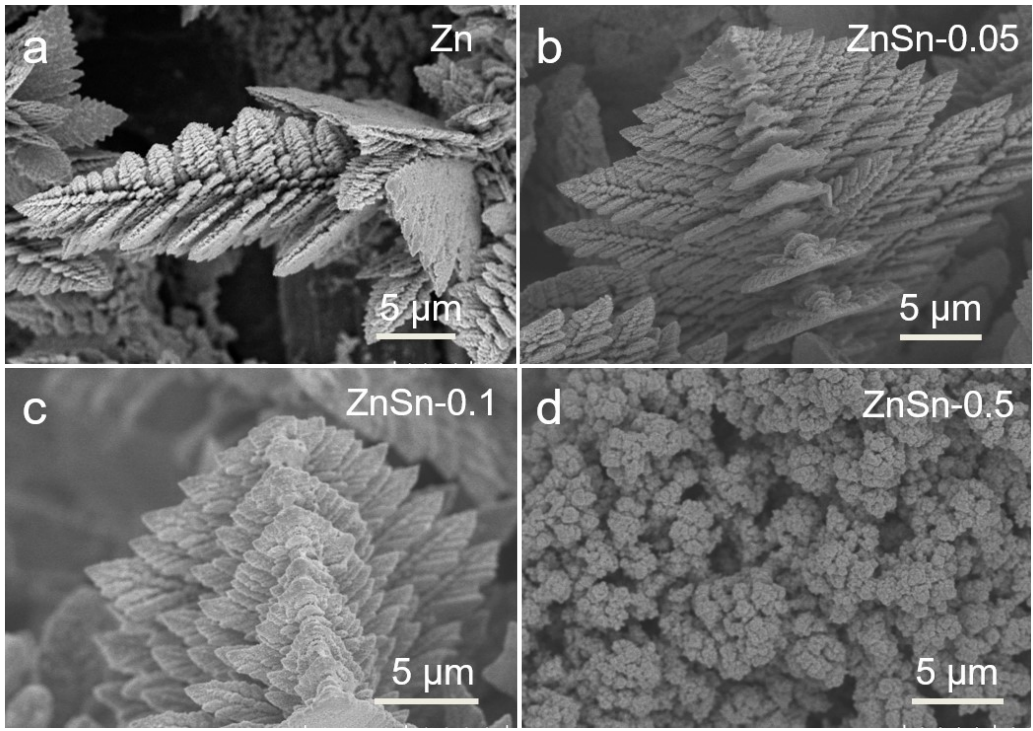

Figure S2. SEM images of Zn, ZnSn-0.05, ZnSn-0.1, and ZnSn-0.5.

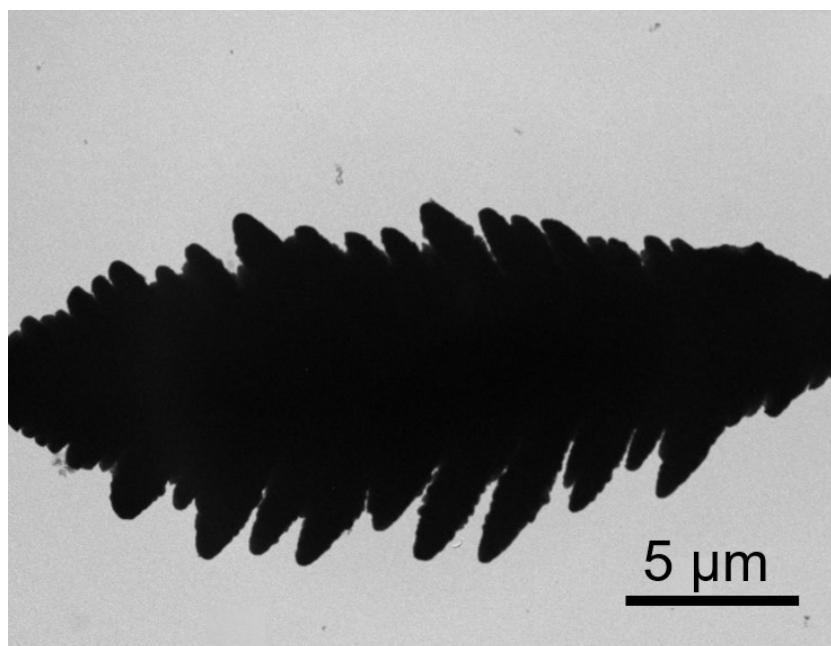

Figure S3. TEM image for ZnSn-0.05.

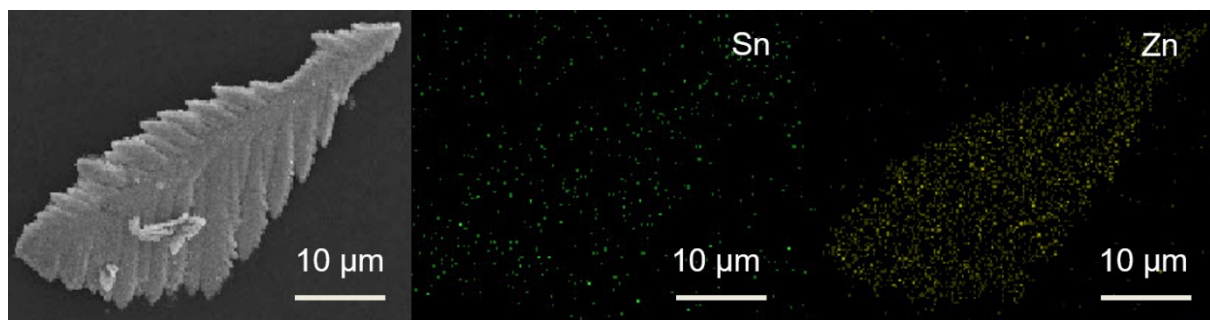

Figure S4. EDS for ZnSn-0.05 electrocatalyst.

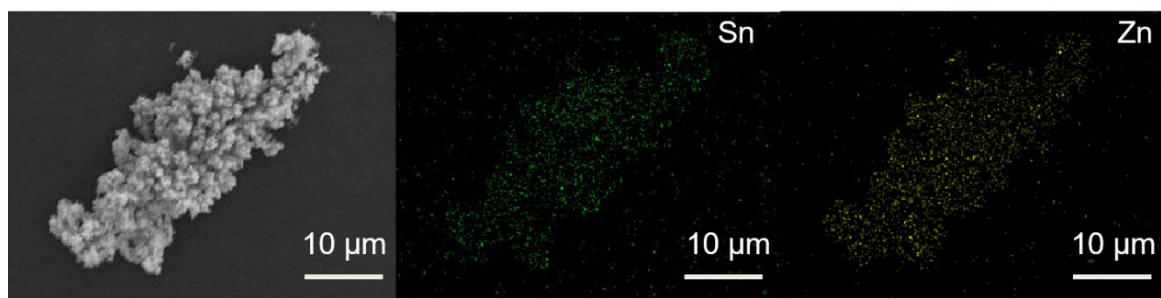

Figure S5. EDS for ZnSn-0.5 electrocatalyst.

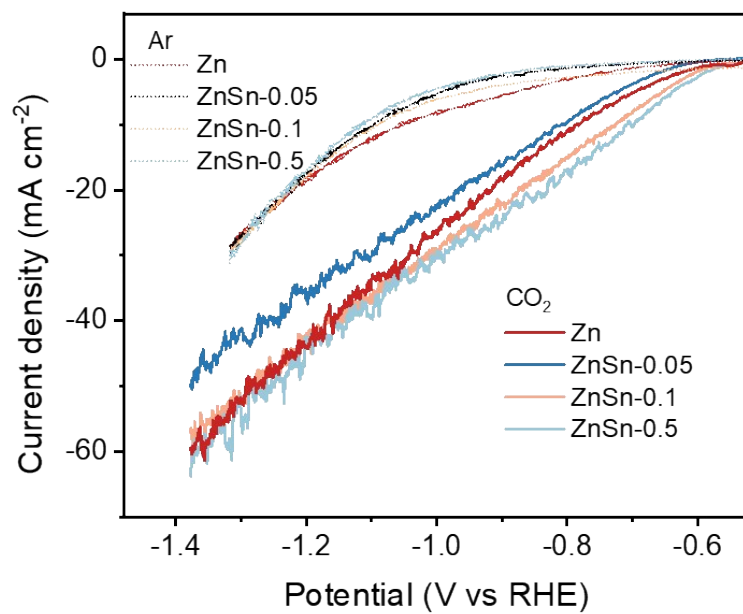

Figure S6. LSV curves of a series of Sn doped Zn materials saturated in CO<sub>2</sub> and Ar in 0.5 M KHCO<sub>3</sub> solution.

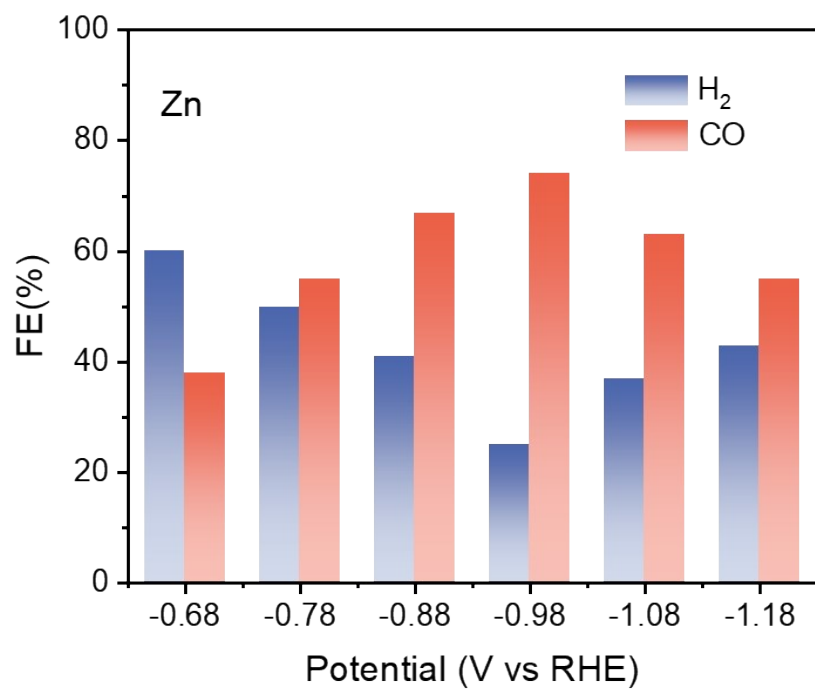

Figure S7. FE for Zn electrocatalyst toward CO<sub>2</sub>RR.



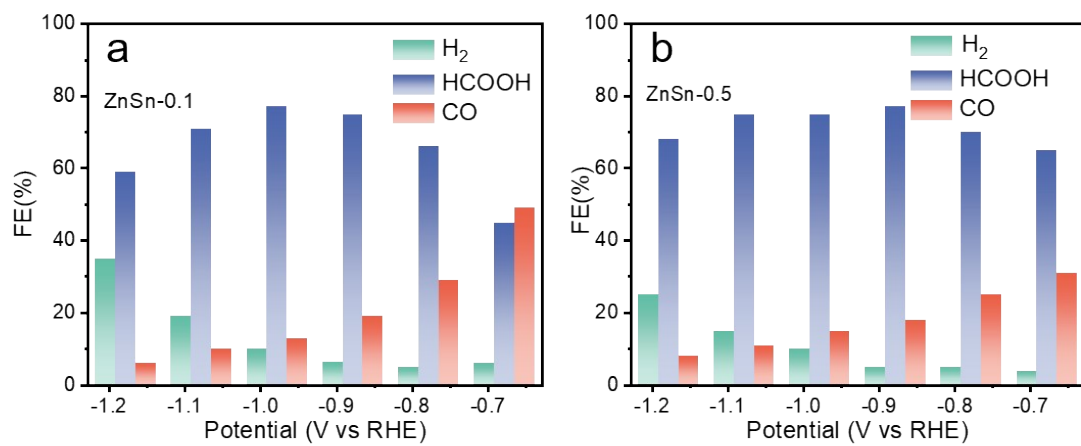

Figure S8. (a) FEs for ZnSn-0.1 and (b) ZnSn-0.5.

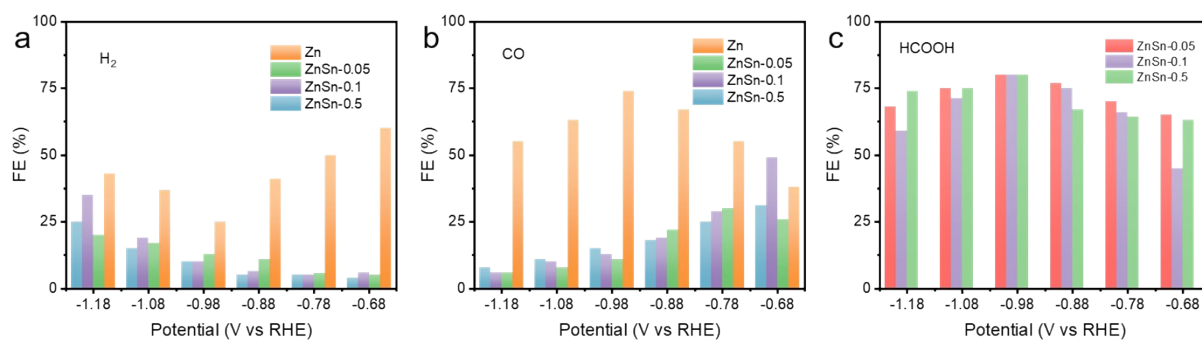

Figure S9. FEs for H<sub>2</sub>, CO and HCOOH formation on prepared catalysts with different content of Sn.

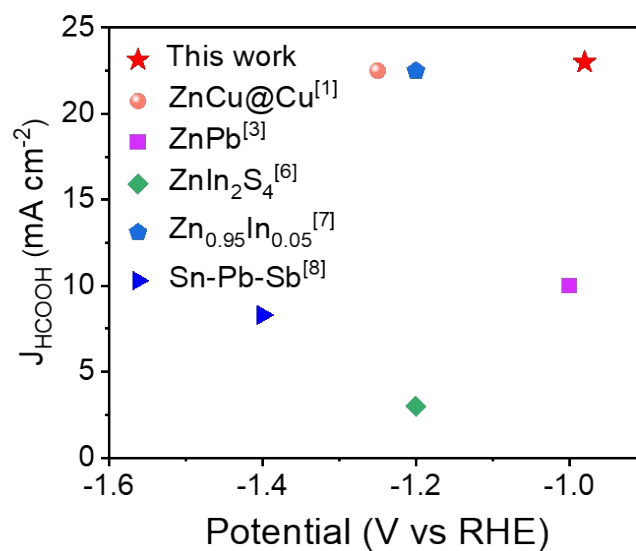

Figure S10. The comparison of corresponding HCOOH partial current density at maximum FE among various reported Zn-based electrocatalysts.

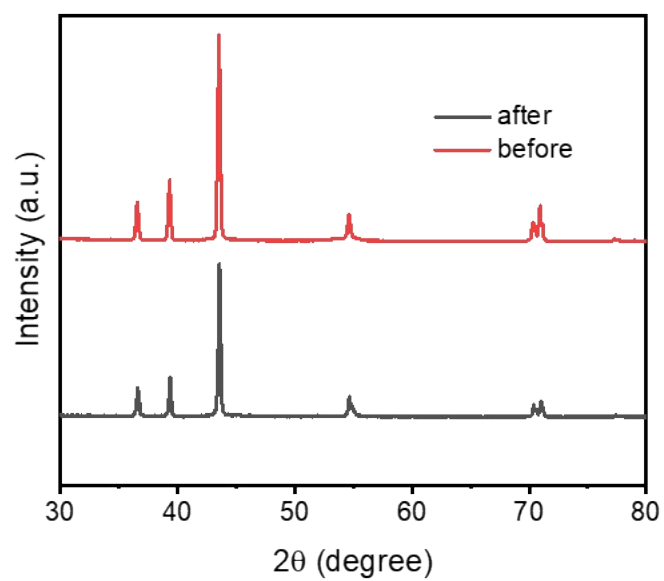

Figure S11. XRD pattern for ZnSn-0.05 before and after long-term electrolysis at at -0.88 V vs. RHE.

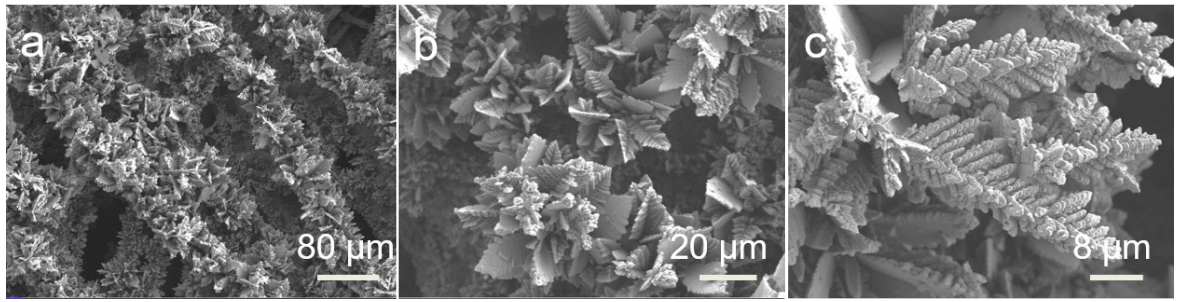

Figure S12. SEM image for ZnSn-0.05 after long-term electrolysis.

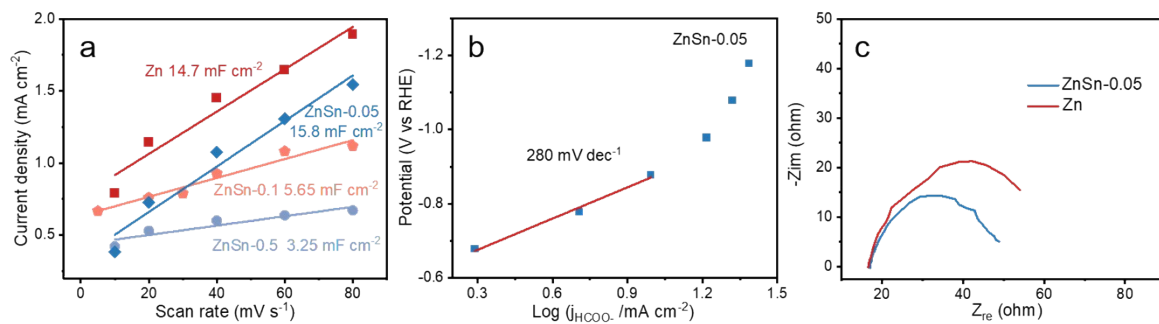

Figure S13. (a) Double-layer capacitance (C<sub>dl</sub>) values for Zn, ZnSn-0.05, ZnSn-0.1, and ZnSn-0.5, (b) Tafel plot for producing HCOO<sup>-</sup>, and (c) Nyquist plots for EIS analysis of ZnSn-0.05 and Zn.

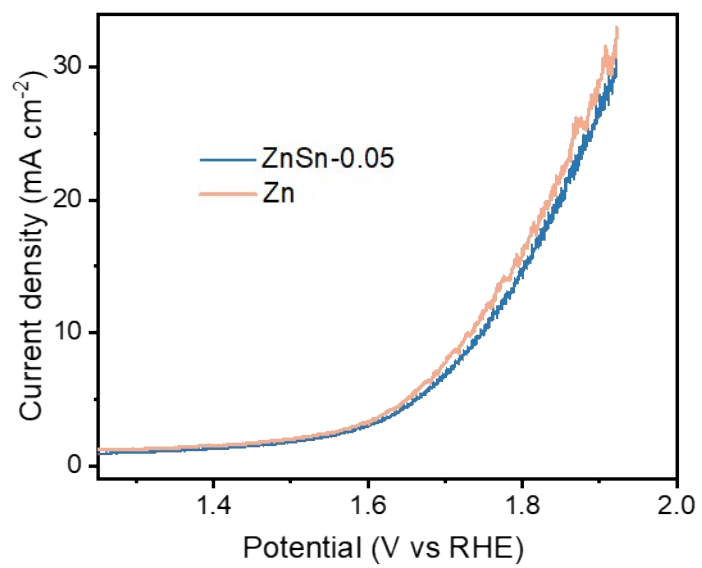

Figure S14. LSV curves for Zn and ZnSn-0.05 in 1 M KOH solution towards OER.

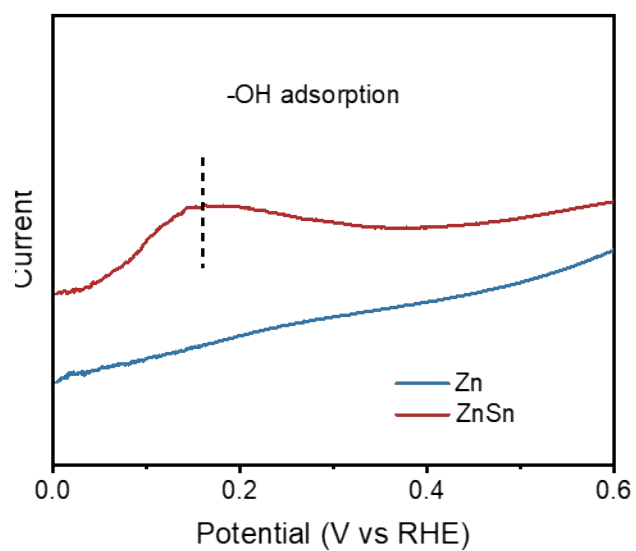

Figure S15. Single oxidative LSV scans in  $N_2$ -saturated 0.1 M NaOH solution of Zn and ZnSn.



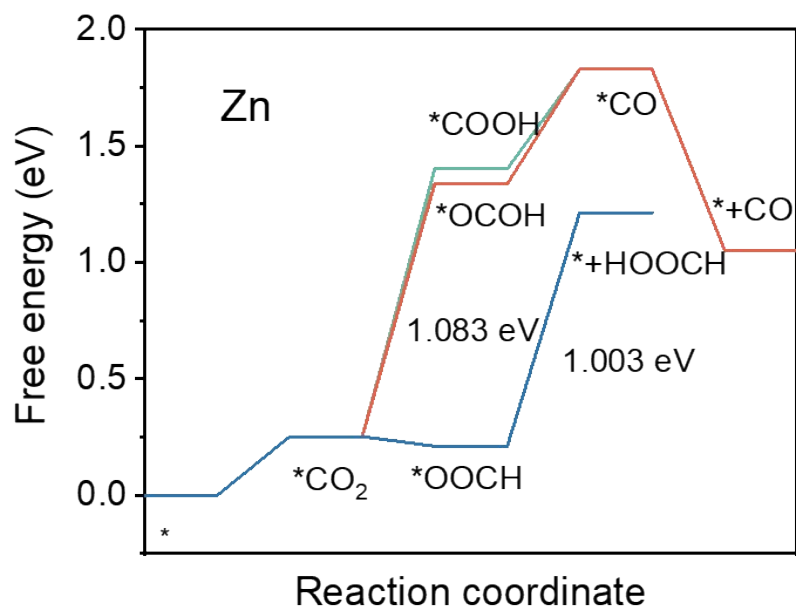

Figure S16. Free energy of CO<sub>2</sub>RR into HCOOH/CO on Zn (002).

Table S1. Comparison of the activities Zn-based catalysts toward formate production

| Catalysts                                            | Electrolyte             | Potential (V vs RHE) | FE (%) | Stability (h) | Content of doping element (%) | Current density (mA cm <sup>-2</sup> ) | Mass activity (mA mg <sub>doping</sub> <sup>-1</sup> ) | Mass FE (% mg <sub>doping</sub> <sup>-1</sup> ) |
|------------------------------------------------------|-------------------------|----------------------|--------|---------------|-------------------------------|----------------------------------------|--------------------------------------------------------|-------------------------------------------------|
| ZnSn-0.05 <sup>[this work]</sup>                     | 0.5 M KHCO <sub>3</sub> | -0.98                | 80     | 21            | Sn-0.27                       | 30                                     | 111.11                                                 | 296.30                                          |
| ZnCu@Cu <sup>[1]</sup>                               | 0.5 M KHCO <sub>3</sub> | -1.25                | 48.6   | 12            | -                             | 30                                     | -                                                      | -                                               |
| Zn <sub>3</sub> Sn <sub>2</sub> <sup>[2]</sup>       | 0.5 M KHCO <sub>3</sub> | -1.1                 | 96.7   | 12            | Sn-39                         | 30                                     | 0.76                                                   | 2.47                                            |
| ZnPb <sup>[3]</sup>                                  | 0.1M KHCO <sub>3</sub>  | -1.0                 | 95     | 8             | Pb-0.7                        | 20                                     | 28.5                                                   | 135.71                                          |
| ZnBi <sub>3</sub> <sup>[4]</sup>                     | 0.1 M KHCO <sub>3</sub> | -0.8                 | 94     | 7             | -                             | 3.8                                    | -                                                      | -                                               |
| Sn <sub>56.3</sub> Pb <sub>43.7</sub> <sup>[5]</sup> | 0.5 M KHCO <sub>3</sub> | -1.4                 | 80     | none          | -                             | 56.25                                  | -                                                      | -                                               |
| ZnIn <sub>2</sub> S <sub>4</sub> <sup>[6]</sup>      | 0.1 M KHCO <sub>3</sub> | -1.2                 | 91     | 10            | -                             | 4.5                                    | -                                                      | -                                               |
| Zn <sub>0.95</sub> In <sub>0.05</sub> <sup>[7]</sup> | 0.5 M KHCO <sub>3</sub> | -1.2                 | 95     | 1             | In-8                          | 22                                     | 2.75                                                   | 11.875                                          |
| Oxide-derived Sn-Pb-Sb <sup>[8]</sup>                | 0.1 M KHCO <sub>3</sub> | -1.4                 | 91     | 1.5           | -                             | 10                                     | -                                                      | -                                               |
| Sn-ZnO <sup>[9]</sup>                                | 0.5 M KHCO <sub>3</sub> | -1.2                 | 80     | 11            | Sn-1.02                       | 60                                     | 58.8                                                   | 78.43                                           |

Table S2. Carbon conversion efficiency (CCE) of prepared materials at -0.98 V vs RHE.

| Sample | Zn   | ZnSn-0.05 | ZnSn-0.1 | ZnSn-0.5 |
|--------|------|-----------|----------|----------|
| CCE    | 2.8% | 3.3%      | 3.4%     | 3.4%     |

According to reported work <sup>[10]</sup>, carbon conversion efficiency (CCE) towards CO<sub>2</sub>RR was calculated as a ratio of the molar amount of carbon following this equation:

$$CCE = \frac{n(CO) + n(HCOOH)}{n(CO_2) + n(TIC)} * 100\%$$

$n(CO)$ : obtained from GC

$n(HCOOH)$ : obtained from HPLC

$$n(CO_2) = \frac{pV}{RT}$$

$p$ : 1 bar

$R$ : 0.083144598 L bar mol<sup>-1</sup> K<sup>-1</sup>

$V = v * t$

$v = 20$  mL/min

TIC: total inorganic carbon. In our work: TIC= 12 mmol and  $n(CO_2) = 7.5$  mmol

Table S3. EE of the aqueous rechargeable Zn-CO<sub>2</sub> electrochemical cell

| Current (mA) | Discharge voltage (V) | FE of CO <sub>2</sub> to HCOOH | FE of CO <sub>2</sub> to CO | Charge voltage (V) | FE of H <sub>2</sub> O → H <sub>2</sub> +1/2O <sub>2</sub> | EE <sub>1</sub> | EE <sub>2</sub> |
|--------------|-----------------------|--------------------------------|-----------------------------|--------------------|------------------------------------------------------------|-----------------|-----------------|
| 0.5          | 0.3316                | 58%                            | 20%                         | 2.44               | 10%                                                        | 56.15%          | 61.5%           |
| 1            | 0.3196                | 60%                            | 23%                         | 2.5                | 8%                                                         | 57.06%          | 61.19%          |
| 1.5          | 0.302                 | 61%                            | 23%                         | 2.57               | 8%                                                         | 55.19%          | 59.34%          |
| 2            | 0.2826                | 63%                            | 26%                         | 2.64               | 7%                                                         | 55.65%          | 59.19%          |

Note: EE<sub>1</sub> is calculated based on CO<sub>2</sub> splitting in the cell, EE<sub>2</sub> is calculated when water splitting is also accounted for.

According to reported work <sup>[11]</sup>, the energy efficiency (EE) of the cell calculated as follows:

$$EE_1 = \frac{\Delta G_{output}}{\Delta G_{input}} = \frac{nE_{discharge}F + FE_{CO + HCOOH} * \Delta G_{CO2\ splitting}}{nE_{charge}F}$$

$$EE_2 = \frac{\Delta G_{output}}{\Delta G_{input}} = \frac{nE_{discharge}F + FE_{CO + HCOOH} * \Delta G_{CO2\ splitting} + E_{H2} * \Delta G_{H2O\ splitting}}{nE_{charge}F}$$

$$\Delta G_{H2O\ splitting} = 257.38\ KJ\ mol^{-1}$$

$$\Delta G_{CO2\ splitting} = 257.38\ KJ\ mol^{-1}$$

Table S4. The atomic model of SnZn and Zn. Blue: Zn atoms; Yellow: Sn atoms; Red: H atoms; white: O atoms; grey: C atoms.

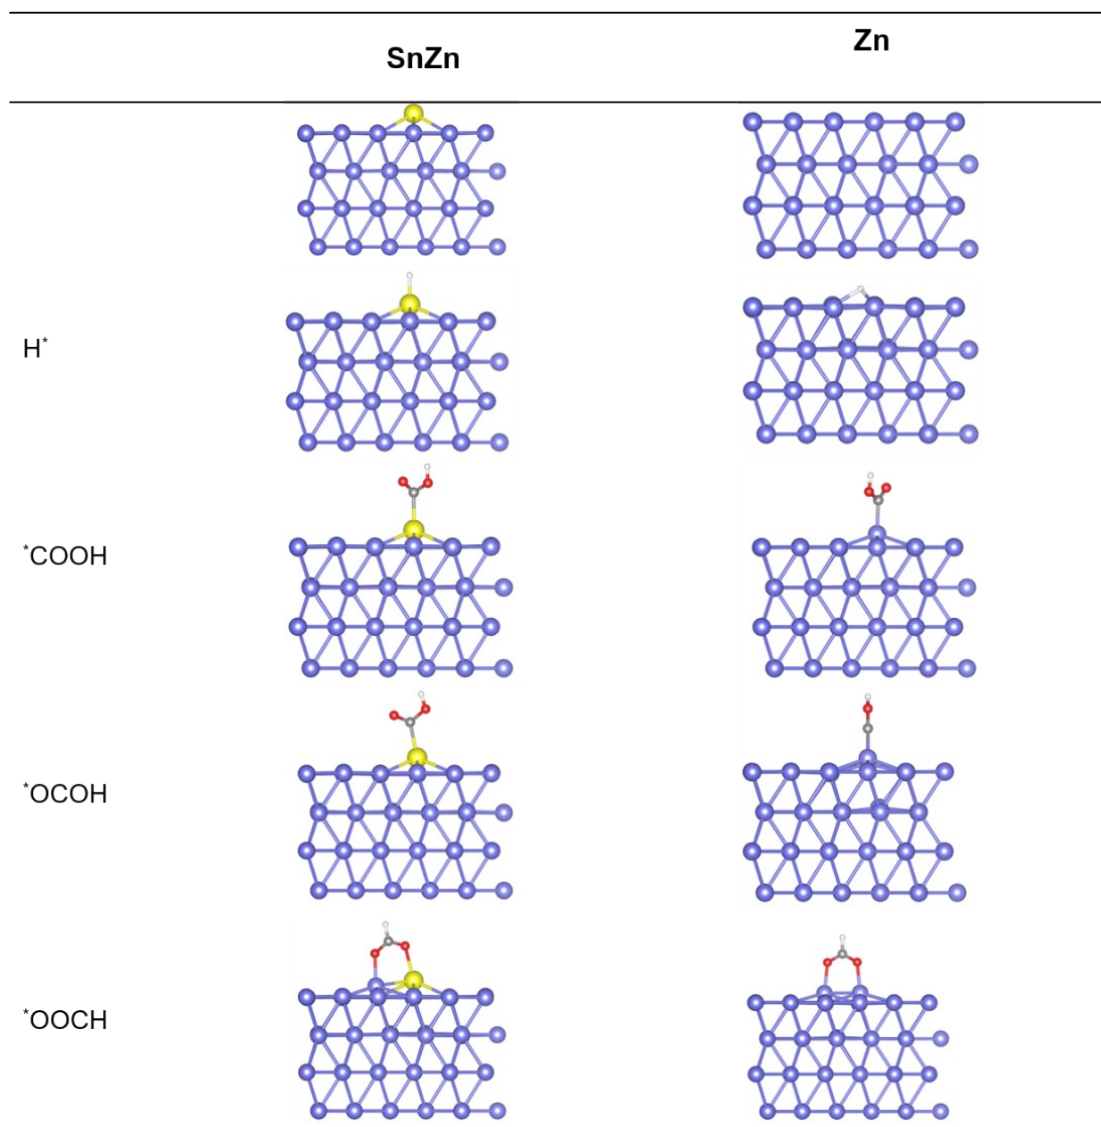

## References

1. Mosali VSS, Zhang X, Zhang Y, et al. Electrocatalytic CO<sub>2</sub> Reduction to Formate on Cu Based Surface Alloys with Enhanced Selectivity. *ACS Sustainable Chemistry & Engineering*. 2019, 7, 19453-19462.
2. Liu W, Zhang Z, Huo S, et al. Bimetallic Zn<sub>3</sub>Sn<sub>2</sub> electrocatalyst derived from mixed oxides enhances formate production towards CO<sub>2</sub> electroreduction reaction. *Appl Surf Sci*. 2023, 608, 155110.
3. Mohamed AGA, Zhou E, Zeng Z, et al. Asymmetric Oxo-Bridged ZnPb Bimetallic Electrocatalysis Boosting CO<sub>2</sub> - to - HCOOH Reduction. *Adv Sci (Weinh)*. 2021, e2104138.
4. Zhang T, Qiu Y, Yao P, et al. Bi-Modified Zn Catalyst for Efficient CO<sub>2</sub> Electrochemical Reduction to Formate. *ACS Sustainable Chemistry & Engineering*. 2019, 7, 15190-15196.
5. Choi SY, Jeong SK, Kim HJ, et al. Electrochemical Reduction of Carbon Dioxide to Formate on Tin–Lead Alloys. *ACS Sustainable Chemistry & Engineering*. 2016, 4, 1311-1318.
6. Wang ZT, Qi RJ, Liu DY, et al. Exfoliated Ultrathin ZnIn<sub>2</sub>S<sub>4</sub> Nanosheets with Abundant Zinc Vacancies for Enhanced CO<sub>2</sub> Electroreduction to Formate. *Chemsuschem*. 2021, 14, 852-859.
7. Kwon IS, Debela TT, Kwak IH, et al. Selective electrochemical reduction of carbon dioxide to formic acid using indium–zinc bimetallic nanocrystals. *J Mater Chem A*. 2019, 7, 22879-22883.
8. Rasul S, Pugniant A, Xiang H, et al. Low cost and efficient alloy electrocatalysts for CO<sub>2</sub> reduction to formate. *Journal of CO<sub>2</sub> Utilization*. 2019, 32, 1-10.
9. Zhang, Y.; Jang, H.; Ge, X.; Zhang, W.; Li, Z.; Hou, L.; Zhai, L.; Wei, X.; Wang, Z.; Kim, M. G.; Liu, S.; Qin, Q.; Liu, X.; Cho, J., Single-Atom Sn on Tensile-Strained ZnO Nanosheets for Highly Efficient Conversion of CO<sub>2</sub> into Formate. *Adv. Energy Mater*. 2022. 12, 2202695.
10. Izadi, P.; Song, J.; Singh, C.; Pant, D.; Harnisch, F., Assessing the Electrochemical CO<sub>2</sub> Reduction Reaction Performance Requires More Than Reporting Coulombic Efficiency. *Advanced Energy and Sustainability Research* 2024, 5, 2400031
11. Wang, X.; Xie, J.; Ghausi, M. A.; Lv, J.; Huang, Y.; Wu, M.; Wang, Y.; Yao, J., Rechargeable Zn-CO<sub>2</sub> Electrochemical Cells Mimicking Two-Step Photosynthesis. *Adv. Mater*. 2019, e1807807.
